# Supplementary material for: ADAR1-mediated RNA-editing of 3′UTRs in breast cancer
Source: PubMed Central journal article supplement (PMC6172785; doi:10.1186/s40659-018-0185-4), 2018-10-05
Supplement: 40659_2018_185_MOESM2_ESM.pdf [file 40659_2018_185_MOESM2_ESM.pdf]

**Additional File 2.**

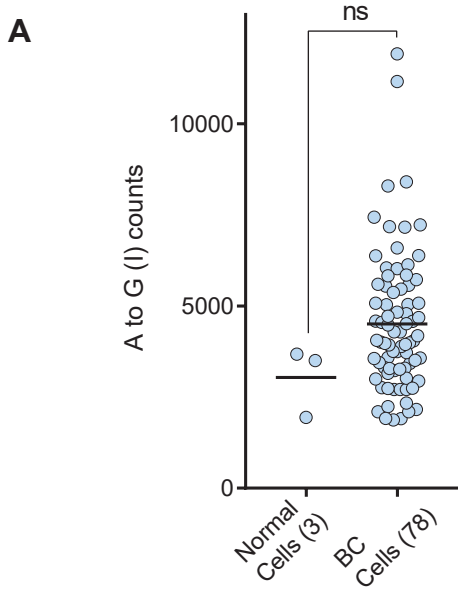

**Figure S1A. A to G (I) counts comparison between Normal Cells (3) and BC cells (78). ns: non-significant differences, Kolmogorov-Smirnov Test.**

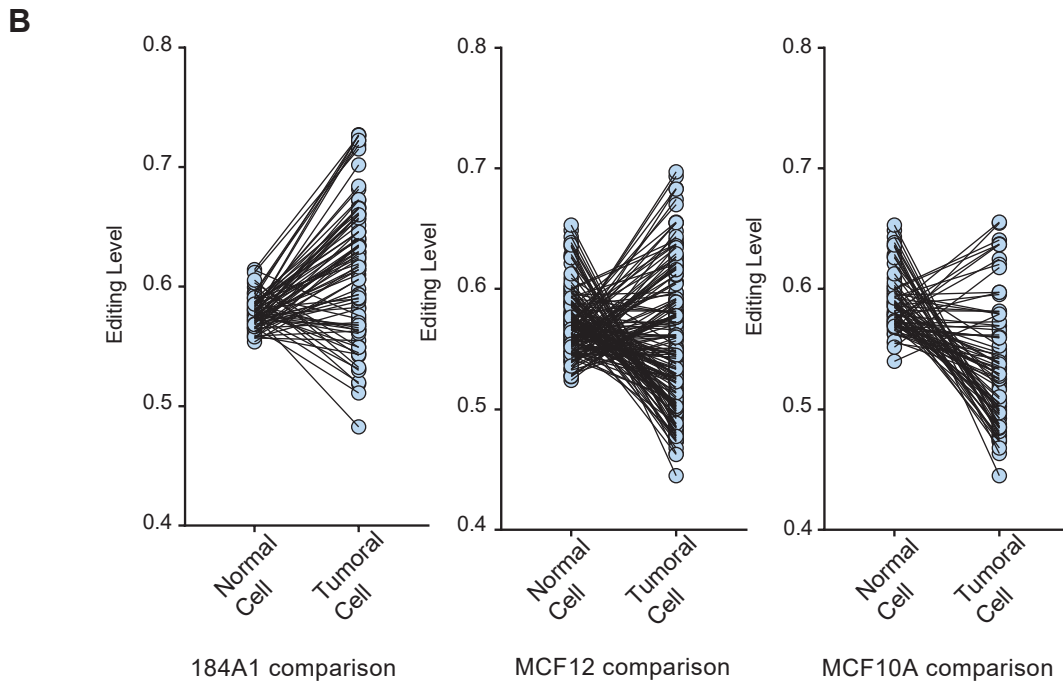

**Figure S1B. Editing level comparison between normal and BC cells for those shared variants located at 3'UTRs. Displayed the mean editing level for each paired comparisons**
